# Supplementary material for: In vivo plant-bacteria interaction rather than root exudates exploitation determines the evolution of bacterial rhizosphere adaptation
Source: Research Square preprint supplement (doi:10.21203/rs.3.rs-6220679/v1), 2025-04-17
Supplement: Supplementary file 1 [file 745a1b517c7a49934426aaa3.xlsx]

## Sheet: Sheet1
Note:
"Mn" indicates the Bacillus amyloliquefaciens DSM7T variant was isolated from in in vitro evolution, "Rn" indicates the Bacillus amyloliquefaciens DSM7T variant was isolated from in vivo evolution.
"T5" indicates the variant was isolated from 5th transfer, "T20" indicates the variant was isolated from 20th transfer

## Sheet: Sheet2
linage	seq_id	position	ref_seq	mut_seq	type	snp_type	annotation	gene	description	tag	occurrence times	classification	T0	T5	T10	T15	T20
M1	FN597644	119246	C	GAA	INS	---	coding (296/534 nt)	nusG	transcription antitermination factor	BAMF_0101	3	early Fixed	0	0	1	1	1
M1	FN597644	119251	C	G	SNP	nonsynonymous	L101V (CTT>GTT)	nusG	transcription antitermination factor	BAMF_0101	3	early Fixed	0	0	1	1	1
M1	FN597644	119253	TTTA	AACG	SUB	---	coding (303-306/534 nt)	nusG	transcription antitermination factor	BAMF_0101	3	early Fixed	0	0	1	1	1
M1	FN597644	283534	G	T	SNP	intergenic	intergenic (+37/+7)	yceA/yceB	zinc ABC transporter (permease)/putative monooxygenase	BAMF_0260/BAMF_0261	1	unfixed	0	0	0.111725	0	0
M1	FN597644	668164	G	A	SNP	nonsynonymous	E172K (GAG>AAG)	purN	phosphoribosylglycinamide formyltransferase	BAMF_0645	4	early Fixed	0	1	1	1	1
M1	FN597644	707494	CTGGAAGAC	---	DEL	---	coding (673-681/720 nt)	yeeI	conserved hypothetical protein	BAMF_0677	1	unfixed	0	0	0.28405	0	0
M1	FN597644	812441	C	T	SNP	intergenic	intergenic (-11/-96)	yfjQ/yfjP	magnesium transport in/out via permease (no H+)/putative DNA-modified purine glycosidase	BAMF_0773/BAMF_0774	4	early Fixed	0	0.926122	1	1	1
M1	FN597644	1198540	C	T	SNP	synonymous	P191P (CCG>CCA)	yisU	putative aminoacid related metabolite efflux transporter	BAMF_1171	4	early Fixed	0	1	1	1	1
M1	FN597644	1256230	C	T	SNP	nonsynonymous	M265I (ATG>ATA)	yjbH	putative thiol management oxidoreductase component	BAMF_1229	1	late Fixed	0	0	0	0	1
M1	FN597644	1371882	289-bp	---	DEL	---	---	[ykaA]	[ykaA]	[BAMF_1373]	3	early Fixed	0	0	1	1	1
M1	FN597644	1451730	T	T	INS	---	coding (2096/2097 nt)	clpE	ATP-dependent Clp protease (class III stress gene)	BAMF_1449	3	unfixed	0	1	1	1	0
M1	FN597644	2044244	TC	CT	SUB	---	intergenic (+91/+41)	iseA/BAMF__t62	IseA/tRNA-Arg	BAMF_1943/BAMF__t62	1	unfixed	0	1	0	0	0
M1	FN597644	2131896	G	A	SNP	intergenic	intergenic (+30/+7)	yodF/RBAM_019350	putative Na+/metabolite permease/RBAM_019350	BAMF_2030/BAMF_2031	3	early Fixed	0	0	1	1	1
M1	FN597644	2385455	1136-bp	---	DEL	---	---	[alrB]–[spo0A]	[alrB],[spo0A]	[BAMF_2325]–[BAMF_2326]	3	early Fixed	0	0	1	1	1
M1	FN597644	2387074	G	A	SNP	nonsense	R13* (CGA>TGA)	spo0A	response regulator	BAMF_2326	1	unfixed	0	0.118393	0	0	0
M1	FN597644	3395889	C	A	SNP	intergenic	intergenic (+7/+10)	yvpB/yvoF	putative hydrolase/putative O-acetyltransferase	BAMF_3340/BAMF_3341	1	unfixed	0	0	0	0.107661	0
M1	FN597644	3574744	T	C	SNP	nonsynonymous	H324R (CAC>CGC)	atpD	ATP synthase (subunit beta, component F1)	BAMF_3518	3	late Fixed	0	0	0.680584	1	1
M2	FN597644	119246	C	GAA	INS	---	coding (296/534 nt)	nusG	transcription antitermination factor	BAMF_0101	2	unfixed	0	0	1	0.717528	0
M2	FN597644	119251	C	G	SNP	nonsynonymous	L101V (CTT>GTT)	nusG	transcription antitermination factor	BAMF_0101	1	unfixed	0	0	1	0	0
M2	FN597644	119253	TTTA	AACG	SUB	---	coding (303-306/534 nt)	nusG	transcription antitermination factor	BAMF_0101	1	unfixed	0	0	1	0	0
M2	FN597644	119253	T	A	SNP	synonymous	L101L (CTT>CTA)	nusG	transcription antitermination factor	BAMF_0101	1	unfixed	0	0	0	0.743742	0
M2	FN597644	119254	T	A	SNP	nonsynonymous	L102I (TTA>ATA)	nusG	transcription antitermination factor	BAMF_0101	1	unfixed	0	0	0	0.743034	0
M2	FN597644	119255	T	C	SNP	nonsynonymous	L102S (TTA>TCA)	nusG	transcription antitermination factor	BAMF_0101	1	unfixed	0	0	0	0.743625	0
M2	FN597644	119256	A	G	SNP	synonymous	L102L (TTA>TTG)	nusG	transcription antitermination factor	BAMF_0101	1	unfixed	0	0	0	0.743611	0
M2	FN597644	283534	G	T	SNP	intergenic	intergenic (+37/+7)	yceA/yceB	zinc ABC transporter (permease)/putative monooxygenase	BAMF_0260/BAMF_0261	1	unfixed	0	0	0	0.105629	0
M2	FN597644	571455	C	A	SNP	intergenic	intergenic (+7/+32)	tatCY/ydiK	component of the twin-arginine pre-protein translocation pathway/conserved hypothetical protein	BAMF_0536/BAMF_0537	1	unfixed	0	0.144716	0	0	0
M2	FN597644	650324	C	T	SNP	intergenic	intergenic (+2/-162)	yebA/guaA	conserved hypothetical protein/GMP synthetase	BAMF_0627/BAMF_0628	1	late Fixed	0	0	0	0	1
M2	FN597644	668164	G	A	SNP	nonsynonymous	E172K (GAG>AAG)	purN	phosphoribosylglycinamide formyltransferase	BAMF_0645	4	early Fixed	0	1	1	1	1
M2	FN597644	812441	C	T	SNP	intergenic	intergenic (-11/-96)	yfjQ/yfjP	magnesium transport in/out via permease (no H+)/putative DNA-modified purine glycosidase	BAMF_0773/BAMF_0774	4	early Fixed	0	0.948792	1	1	1
M2	FN597644	1198540	C	T	SNP	synonymous	P191P (CCG>CCA)	yisU	putative aminoacid related metabolite efflux transporter	BAMF_1171	4	early Fixed	0	1	1	1	1
M2	FN597644	1370461	T	CGTGTGT	INS	---	coding (835/999 nt)	pit	low-affinity inorganic phosphate transporter	BAMF_1372	1	late Fixed	0	0	0	0	1
M2	FN597644	1370568	24-bp	---	DEL	---	coding (705-728/999 nt)	pit	low-affinity inorganic phosphate transporter	BAMF_1372	1	unfixed	0	0.216435	0	0	0
M2	FN597644	1370572	27-bp	---	DEL	---	coding (698-724/999 nt)	pit	low-affinity inorganic phosphate transporter	BAMF_1372	1	unfixed	0	0.286885	0	0	0
M2	FN597644	1371882	289-bp	---	DEL	---	---	[ykaA]	[ykaA]	[BAMF_1373]	1	unfixed	0	0	1	0	0
M2	FN597644	1451730	T	T	INS	---	coding (2096/2097 nt)	clpE	ATP-dependent Clp protease (class III stress gene)	BAMF_1449	4	early Fixed	0	1	1	1	1
M2	FN597644	1596751	T	A	SNP	intergenic	intergenic (+358/-187)	divIB/ftsA	cell-division initiation protein/cell-division protein essential fo Z-ring assembly	BAMF_1598/BAMF_1599	1	unfixed	0	1	0	0	0
M2	FN597644	1596752	A	T	SNP	intergenic	intergenic (+359/-186)	divIB/ftsA	cell-division initiation protein/cell-division protein essential fo Z-ring assembly	BAMF_1598/BAMF_1599	1	unfixed	0	0.940208	0	0	0
M2	FN597644	2044244	TC	CT	SUB	---	intergenic (+91/+41)	iseA/BAMF__t62	IseA/tRNA-Arg	BAMF_1943/BAMF__t62	1	unfixed	0	1	0	0	0
M2	FN597644	2131896	G	A	SNP	intergenic	intergenic (+30/+7)	yodF/RBAM_019350	putative Na+/metabolite permease/RBAM_019350	BAMF_2030/BAMF_2031	2	unfixed	0	0	1	0.916918	0
M2	FN597644	2137238	G	T	SNP	nonsynonymous	Q60K (CAA>AAA)	ctpA	carboxy-terminal processing protease	BAMF_2034	1	late Fixed	0	0	0	0	1
M2	FN597644	2385455	1136-bp	---	DEL	---	---	[alrB]–[spo0A]	[alrB],[spo0A]	[BAMF_2325]–[BAMF_2326]	3	early Fixed	0	0	1	1	1
M2	FN597644	2643133	G	A	SNP	nonsense	Q37* (CAG>TAG)	spo0B	sporulation initiation phosphotransferase	BAMF_2599	1	unfixed	0	0.945611	0	0	0
M2	FN597644	2663773	T	---	DEL	---	coding (623/783 nt)	hemD3	uroporphyrinogen III cosynthase	BAMF_2621	1	late Fixed	0	0	0	0	1
M2	FN597644	3578006	C	A	SNP	nonsynonymous	G61V (GGT>GTT)	atpA	ATP synthase (subunit alpha, component F1)	BAMF_3520	1	late Fixed	0	0	0	0	1
M3	FN597644	16307	C	T	SNP	nonsynonymous	R144C (CGC>TGC)	guaB	inosine-monophosphate dehydrogenase	BAMF_0009	3	late Fixed	0	0.906725	1	0	1
M3	FN597644	58842	A	G	SNP	synonymous	M1M (ATG>GTG)	prs	phosphoribosylpyrophosphate synthetase	BAMF_0051	1	late Fixed	0	0	0	0	1
M3	FN597644	668164	G	A	SNP	nonsynonymous	E172K (GAG>AAG)	purN	phosphoribosylglycinamide formyltransferase	BAMF_0645	4	early Fixed	0	1	1	1	1
M3	FN597644	812052	T	---	DEL	---	coding (379/960 nt)	yfjQ	magnesium transport in/out via permease (no H+)	BAMF_0773	1	unfixed	0	0	0	1	0
M3	FN597644	812441	C	T	SNP	intergenic	intergenic (-11/-96)	yfjQ/yfjP	magnesium transport in/out via permease (no H+)/putative DNA-modified purine glycosidase	BAMF_0773/BAMF_0774	3	late Fixed	0	1	1	0	1
M3	FN597644	996931	T	C	SNP	nonsynonymous	K273E (AAA>GAA)	ygaK	putative FAD-dependent oxido-reductase	BAMF_0970	1	unfixed	0	0	0.150942	0	0
M3	FN597644	1137524	C	T	SNP	nonsynonymous	D382N (GAC>AAC)	gltT	proton/sodium-glutamate symport protein	BAMF_1112	1	unfixed	0	0	0	0.369185	0
M3	FN597644	1138042	A	---	DEL	---	coding (626/1290 nt)	gltT	proton/sodium-glutamate symport protein	BAMF_1112	1	unfixed	0	0	0	0.595502	0
M3	FN597644	1198540	C	T	SNP	synonymous	P191P (CCG>CCA)	yisU	putative aminoacid related metabolite efflux transporter	BAMF_1171	4	early Fixed	0	1	1	1	1
M3	FN597644	1252292	G	T	SNP	intergenic	intergenic (+28/-124)	mecA/coiA	adaptor protein controlling oligomerization of the AAA+ protein ClpC/protein involved in establishment of DNA transport in competence	BAMF_1225/BAMF_1226	1	unfixed	0	0	0.105574	0	0
M3	FN597644	1371180	997-bp	---	DEL	---	---	[pit]–ykaA	[pit],ykaA	[BAMF_1372]–[BAMF_1373]	1	unfixed	0	0	0	1	0
M3	FN597644	1371867	A	G	SNP	nonsynonymous	I20T (ATA>ACA)	ykaA	putative Pit accessory protein	BAMF_1373	1	unfixed	0	0	0.141215	0	0
M3	FN597644	1500598	C	A	SNP	intergenic	intergenic (+11/+23)	ykuS/ykuT	conserved hypothetical protein/putative small-conductance mechanosensitive channel	BAMF_1496/BAMF_1497	1	unfixed	0	0	0	0	0.115834
M3	FN597644	1596751	T	A	SNP	intergenic	intergenic (+358/-187)	divIB/ftsA	cell-division initiation protein/cell-division protein essential fo Z-ring assembly	BAMF_1598/BAMF_1599	1	late Fixed	0	0	0	0	1
M3	FN597644	1596752	A	T	SNP	intergenic	intergenic (+359/-186)	divIB/ftsA	cell-division initiation protein/cell-division protein essential fo Z-ring assembly	BAMF_1598/BAMF_1599	1	unfixed	0	0	0	0	0.917885
M3	FN597644	1638115	C	A	SNP	intergenic	intergenic (+16/+38)	amyA/yloA	AmyA/putative persistent RNA/DNA binding protein	BAMF_1635/BAMF_1636	1	unfixed	0	0.138931	0	0	0
M3	FN597644	1764538	104-bp	---	DEL	---	coding (205-308/729 nt)	ymfI	putative oxidoreductase	BAMF_1760	1	unfixed	0	0	0	1	0
M3	FN597644	2044244	TC	CT	SUB	---	intergenic (+91/+41)	iseA/BAMF__t62	IseA/tRNA-Arg	BAMF_1943/BAMF__t62	1	unfixed	0	0	0	1	0
M3	FN597644	2357402	92-bp	---	DEL	---	coding (22-113/954 nt)	yqjA	conserved hypothetical protein	BAMF_2294	1	late Fixed	0	0	0	0	1
M3	FN597644	2386507	T	---	DEL	---	coding (604/801 nt)	spo0A	response regulator	BAMF_2326	1	unfixed	0	0	0	1	0
M3	FN597644	2386657	1401-bp	---	DEL	---	---	[spo0A]–[spoIVB]	[spo0A],[spoIVB]	[BAMF_2326]–[BAMF_2327]	3	late Fixed	0	1	1	0	1
M3	FN597644	2616744	G	A	SNP	nonsynonymous	P322S (CCG>TCG)	relA	GTP pyrophosphokinase (RelA/SpoT)	BAMF_2570	1	unfixed	0	0	0	1	0
M3	FN597644	2673864	T	C	SNP	nonsynonymous	D198G (GAC>GGC)	clpX	protein unfolding ATPase required for presentation of proteins to proteases	BAMF_2629	2	late Fixed	0	0	0.825099	0	1
M3	FN597644	3413308	A	C	SNP	nonsynonymous	F193C (TTC>TGC)	uvrB	excinuclease ABC (subunit B)	BAMF_3356	1	unfixed	0	0	0	0.101492	0
M3	FN597644	3532178	C	A	SNP	intergenic	intergenic (-182/+24)	tkmA/ywzD	transmembrane modulator of PtkA activity, activates PtkA autophosphorylation and substrate phosphorylation/hypothetical protein YwzD	BAMF_3470/BAMF_3471	1	unfixed	0	0	0.108505	0	0
M3	FN597644	3777252	C	A	SNP	intergenic	intergenic (+9/+26)	yxjG/yxjB	putative methyltetrahydrofolate methyltransferase/rRNA (guanine-N1-)-methyltransferase, putative	BAMF_3724/BAMF_3725	1	unfixed	0	0	0	0.108644	0
M4	FN597644	58963	T	G	SNP	nonsynonymous	F41C (TTT>TGT)	prs	phosphoribosylpyrophosphate synthetase	BAMF_0051	2	late Fixed	0	0	0	0.217031	1
M4	FN597644	668164	G	A	SNP	nonsynonymous	E172K (GAG>AAG)	purN	phosphoribosylglycinamide formyltransferase	BAMF_0645	4	early Fixed	0	1	1	1	1
M4	FN597644	812052	T	---	DEL	---	coding (379/960 nt)	yfjQ	magnesium transport in/out via permease (no H+)	BAMF_0773	3	late Fixed	0	1	0	1	1
M4	FN597644	812441	C	T	SNP	intergenic	intergenic (-11/-96)	yfjQ/yfjP	magnesium transport in/out via permease (no H+)/putative DNA-modified purine glycosidase	BAMF_0773/BAMF_0774	2	unfixed	0	0.0780611	0.693921	0	0
M4	FN597644	1137524	C	T	SNP	nonsynonymous	D382N (GAC>AAC)	gltT	proton/sodium-glutamate symport protein	BAMF_1112	1	unfixed	0	0	0	0.268876	0
M4	FN597644	1138042	A	---	DEL	---	coding (626/1290 nt)	gltT	proton/sodium-glutamate symport protein	BAMF_1112	1	unfixed	0	0	0	0.439711	0
M4	FN597644	1198540	C	T	SNP	synonymous	P191P (CCG>CCA)	yisU	putative aminoacid related metabolite efflux transporter	BAMF_1171	4	early Fixed	0	1	1	1	1
M4	FN597644	1370868	G	A	SNP	nonsynonymous	S143L (TCA>TTA)	pit	low-affinity inorganic phosphate transporter	BAMF_1372	1	unfixed	0	0	0.246485	0	0
M4	FN597644	1371180	997-bp	---	DEL	---	---	[pit]–ykaA	[pit],ykaA	[BAMF_1372]–[BAMF_1373]	2	late Fixed	0	0	0	1	1
M4	FN597644	1371913	T	TCTTTTTT	INS	---	coding (13/618 nt)	ykaA	putative Pit accessory protein	BAMF_1373	1	unfixed	0	0.292956	0	0	0
M4	FN597644	1451730	T	T	INS	---	coding (2096/2097 nt)	clpE	ATP-dependent Clp protease (class III stress gene)	BAMF_1449	4	early Fixed	0	1	1	1	1
M4	FN597644	1596751	T	A	SNP	intergenic	intergenic (+358/-187)	divIB/ftsA	cell-division initiation protein/cell-division protein essential fo Z-ring assembly	BAMF_1598/BAMF_1599	2	unfixed	0	0	1	1	0
M4	FN597644	1596752	A	T	SNP	intergenic	intergenic (+359/-186)	divIB/ftsA	cell-division initiation protein/cell-division protein essential fo Z-ring assembly	BAMF_1598/BAMF_1599	2	unfixed	0	0	0.934313	0.9379	0
M4	FN597644	1611717	C	T	SNP	nonsynonymous	S8F (TCC>TTC)	ylmG	factor involved in shape determination	BAMF_1611	2	unfixed	0	0	0	0.122514	0.337611
M4	FN597644	1764538	104-bp	---	DEL	---	coding (205-308/729 nt)	ymfI	putative oxidoreductase	BAMF_1760	2	late Fixed	0	0	0	1	1
M4	FN597644	2044244	TC	CT	SUB	---	intergenic (+91/+41)	iseA/BAMF__t62	IseA/tRNA-Arg	BAMF_1943/BAMF__t62	1	unfixed	0	1	0	0	0
M4	FN597644	2297935	A	---	DEL	---	coding (511/522 nt)	ypuF	SMC interacting protein	BAMF_2222	1	late Fixed	0	0	0	0	1
M4	FN597644	2386507	T	---	DEL	---	coding (604/801 nt)	spo0A	response regulator	BAMF_2326	3	late Fixed	0	1	0	1	1
M4	FN597644	2386575	A	G	INS	---	coding (536/801 nt)	spo0A	response regulator	BAMF_2326	1	unfixed	0	0	0.651854	0	0
M4	FN597644	2386575	A	T	INS	---	coding (536/801 nt)	spo0A	response regulator	BAMF_2326	1	unfixed	0	0	0.651858	0	0
M4	FN597644	2616744	G	A	SNP	nonsynonymous	P322S (CCG>TCG)	relA	GTP pyrophosphokinase (RelA/SpoT)	BAMF_2570	3	late Fixed	0	0	0.130313	1	1
M4	FN597644	2820203	C	T	SNP	intergenic	intergenic (-37/+304)	tyrS/acsA	tyrosyl-tRNA synthetase/acetyl-CoA synthetase	BAMF_2767/BAMF_2768	1	unfixed	0	0	0	0.134253	0
M4	FN597644	2997605	A	T	SNP	nonsynonymous	L95H (CTC>CAC)	pgi	glucose-6-phosphate isomerase	BAMF_2935	2	unfixed	0	0.0845475	0.119493	0	0
M4	FN597644	3529633	C	G	SNP	intergenic	intergenic (-69/+131)	ywqF/ptpZ	UDP-glucose 6-dehydrogenase/phosphotyrosin protein phosphatase, antagonist to PtkA	BAMF_3467/BAMF_3468	1	unfixed	0	0	0	0	0.111525
M5	FN597644	185282	G	T	SNP	nonsynonymous	N246K (AAC>AAA)	ybbA	putative bacillibactin esterase	BAMF_0164	1	unfixed	0	0.102609	0	0	0
M5	FN597644	329508	C	A	SNP	intergenic	intergenic (+6/+35)	bglC/nin	aryl-phospho-beta-d-glucosidase/DNA-entry nuclease inhibitor Competence protein J	BAMF_0306/BAMF_0307	1	unfixed	0	0	0.102085	0	0
M5	FN597644	481497	G	A	SNP	nonsynonymous	E135K (GAA>AAA)	rsbRA	component of the piezosome (stressosome); positive regulation of sigma(B) activity in response to salt and heat stress	BAMF_0444	3	late Fixed	0	0	0.190186	0.860074	1
M5	FN597644	668164	G	A	SNP	nonsynonymous	E172K (GAG>AAG)	purN	phosphoribosylglycinamide formyltransferase	BAMF_0645	4	early Fixed	0	1	1	1	1
M5	FN597644	706953	C	A	SNP	nonsynonymous	N44K (AAC>AAA)	yeeI	conserved hypothetical protein	BAMF_0677	3	late Fixed	0	0	0.24689	0.864938	1
M5	FN597644	812441	C	T	SNP	intergenic	intergenic (-11/-96)	yfjQ/yfjP	magnesium transport in/out via permease (no H+)/putative DNA-modified purine glycosidase	BAMF_0773/BAMF_0774	4	early Fixed	0	1	1	1	1
M5	FN597644	1198540	C	T	SNP	synonymous	P191P (CCG>CCA)	yisU	putative aminoacid related metabolite efflux transporter	BAMF_1171	4	early Fixed	0	1	1	1	1
M5	FN597644	1362128	A	---	DEL	---	coding (286/453 nt)	xkdS	conserved hypothetical protein; skin element	BAMF_1359	1	late Fixed	0	0	0	0	1
M5	FN597644	1370463	G	A	SNP	nonsynonymous	T278M (ACG>ATG)	pit	low-affinity inorganic phosphate transporter	BAMF_1372	1	unfixed	0	0.334566	0	0	0
M5	FN597644	1371251	5993-bp	---	DEL	---	---	[pit]–[ykcC]	[pit],ykaA,steT,mhqA,ykcB,[ykcC]	[BAMF_1372]–[BAMF_1377]	3	early Fixed	0	0	1	1	1
M5	FN597644	1451730	T	T	INS	---	coding (2096/2097 nt)	clpE	ATP-dependent Clp protease (class III stress gene)	BAMF_1449	2	late Fixed	0	0	0	1	1
M5	FN597644	1596751	T	A	SNP	intergenic	intergenic (+358/-187)	divIB/ftsA	cell-division initiation protein/cell-division protein essential fo Z-ring assembly	BAMF_1598/BAMF_1599	1	late Fixed	0	0	0	0	1
M5	FN597644	1596752	A	T	SNP	intergenic	intergenic (+359/-186)	divIB/ftsA	cell-division initiation protein/cell-division protein essential fo Z-ring assembly	BAMF_1598/BAMF_1599	1	unfixed	0	0	0	0	0.947611
M5	FN597644	1750780	C	T	SNP	nonsynonymous	T112M (ACG>ATG)	rnjB	ribonuclease J2	BAMF_1750	1	unfixed	0	0	0	0	0.409595
M5	FN597644	1751192	C	TATCAAC	INS	---	coding (747/1704 nt)	rnjB	ribonuclease J2	BAMF_1750	1	unfixed	0	0	0	0	0.11039
M5	FN597644	2386652	213-bp	---	DEL	---	coding (247-459/801 nt)	spo0A	response regulator	BAMF_2326	4	early Fixed	0	1	1	1	1
M5	FN597644	2673864	T	C	SNP	nonsynonymous	D198G (GAC>GGC)	clpX	protein unfolding ATPase required for presentation of proteins to proteases	BAMF_2629	3	early Fixed	0	0	1	1	1
M5	FN597644	3489640	G	T	SNP	intergenic	intergenic (+30/-129)	ywtF/ywtE	putative transcriptional regulator/putative hydrolase	BAMF_3423/BAMF_3424	1	unfixed	0	0.107841	0	0	0
M5	FN597644	3491636	T	G	SNP	nonsynonymous	Q354P (CAG>CCG)	pgdS	gamma-DL-glutamyl hydrolase	BAMF_3426	3	late Fixed	0	0	0.0719066	0.817326	1
M5	FN597644	3559823	TAATTTA	---	DEL	---	intergenic (+176/-781)	clsA/ywnC	cardiolipin synthetase/putative integral inner membrane protein YwnC	BAMF_3500/BAMF_3501	3	late Fixed	0	0	0.261775	0.893369	1
R1	FN597644	113824	T	C	SNP	synonymous	A17A (GCT>GCC)	BAMF_0092	hypothetical protein predicted by Glimmer/Critica	BAMF_0092	1	unfixed	0	0	0	0	0.144947
R1	FN597644	394133	G	A	SNP	synonymous	T137T (ACG>ACA)	yclQ	putative iron-siderophore ABC transporter (binding lipoprotein)	BAMF_0351	2	late Fixed	0	0	0	1	1
R1	FN597644	555622	T	C	SNP	intergenic	intergenic (+50/-380)	yhfP/iolT	conserved hypothetical protein YhfP/Sugar/inositol transporter	BAMF_0525/BAMF_0526	1	unfixed	0	0	0.547958	0	0
R1	FN597644	646020	G	C	SNP	nonsynonymous	G24A (GGA>GCA)	moxR	conserved hypothetical protein	BAMF_0625	2	late Fixed	0	0	0	1	1
R1	FN597644	661209	C	---	DEL	---	intergenic (+37/-42)	purB/purC	adenylosuccinate lyase/phosphoribosylaminoimidazole succinocarboxamide synthetase	BAMF_0638/BAMF_0639	4	early Fixed	0	1	1	1	1
R1	FN597644	776422	C	T	SNP	nonsense	Q3* (CAA>TAA)	yflK	putative sulfur carrier	BAMF_0733	1	unfixed	0	0	0.207201	0	0
R1	FN597644	1130281	C	A	SNP	nonsynonymous	T92N (ACC>AAC)	hemY	protoporphyrinogen IX and coproporphyrinogen III oxidase	BAMF_1107	1	unfixed	0	0	0.208608	0	0
R1	FN597644	1133658	G	A	SNP	nonsynonymous	G475D (GGC>GAC)	yhgE	putative methyl-accepting protein	BAMF_1109	2	late Fixed	0	0	0	1	1
R1	FN597644	1271203	T	C	SNP	intergenic	intergenic (-72/+77)	cotZ/cotY	spore coat protein (insoluble fraction)/outer spore coat protein (insoluble fraction)	BAMF_1248/BAMF_1249	1	unfixed	0	0.225284	0	0	0
R1	FN597644	1343058	C	T	SNP	synonymous	T197T (ACC>ACT)	xkdC	conserved hypothetical protein in PBSX phage element	BAMF_1336	1	unfixed	0	0	0.292108	0	0
R1	FN597644	1627177	C	T	SNP	synonymous	R1024R (CGC>CGT)	pyrAB	pyrimidine-specific carbamoyl-phosphate synthetase (large subunit)	BAMF_1623	1	unfixed	0	0	0.622798	0	0
R1	FN597644	1738086	G	A	SNP	nonsynonymous	V32I (GTC>ATC)	truB	tRNA pseudouridine 55 synthase	BAMF_1738	1	unfixed	0	0	0.293218	0	0
R1	FN597644	2044239	T	---	DEL	---	intergenic (+86/+47)	iseA/BAMF__t62	IseA/tRNA-Arg	BAMF_1943/BAMF__t62	4	unfixed	0	0.0666537	0.0686955	0.127443	0.0991654
R1	FN597644	2044244	T	C	SNP	intergenic	intergenic (+91/+42)	iseA/BAMF__t62	IseA/tRNA-Arg	BAMF_1943/BAMF__t62	4	unfixed	0	0.904937	0.94457	0.892014	0.884505
R1	FN597644	2044245	C	T	SNP	intergenic	intergenic (+92/+41)	iseA/BAMF__t62	IseA/tRNA-Arg	BAMF_1943/BAMF__t62	4	early Fixed	0	1	1	1	1
R1	FN597644	2222001	CCGCT	---	DEL	---	coding (1718-1722/2787 nt)	dinG	damage inducible ATP-dependent helicase	BAMF_2140	1	unfixed	0	0	0	0	0.116386
R1	FN597644	2298582	C	T	SNP	nonsynonymous	G129E (GGA>GAA)	ribH	6,7-dimethyl-8-ribityllumazine synthase, beta subunit	BAMF_2224	1	unfixed	0	0	0.358207	0	0
R1	FN597644	3044376	C	T	SNP	nonsynonymous	R1151H (CGT>CAT)	yukB	putative cell division protein	BAMF_2984	1	unfixed	0	0	0.141091	0	0
R1	FN597644	3137291	G	A	SNP	nonsynonymous	T348I (ACC>ATC)	phi105_20	phage related protein phi105_20	BAMF_3075	2	late Fixed	0	0	0	1	1
R1	FN597644	3151818	C	T	SNP	intergenic	intergenic (+7/+875)	BAMF_3091/phi105_47	hypothetical protein predicted by Glimmer/Critica/hypothetical protein phi105_47 [Bacillus phage phi105]	BAMF_3091/BAMF_3092	1	unfixed	0	0	0.597822	0	0
R1	FN597644	3321696	G	A	SNP	intergenic	intergenic (+67/-116)	RBAM_031420/gntK	Uncharacterized HTH-type transcriptional regulator RBAM_031420/gluconate kinase	BAMF_3264/BAMF_3265	2	late Fixed	0	0	0	1	1
R1	FN597644	3738505	G	A	SNP	synonymous	L223L (CTG>TTG)	licC	lichenan-specific phosphotransferase system, EIIC component	BAMF_3689	1	unfixed	0	0	0.260932	0	0
R1	FN597644	3968295	A	G	SNP	nonsynonymous	F292L (TTT>CTT)	yyaD	putative integral membrane protein; putative transporter	BAMF_3910	2	late Fixed	0	0	0	1	1
R2	FN597644	108436	G	A	SNP	nonsynonymous	V425I (GTC>ATC)	radA	DNA repair protein; 6-O-methylguanine-DNA methyltransferase	BAMF_0086	2	late Fixed	0	0	0	1	1
R2	FN597644	130788	G	A	SNP	nonsynonymous	R12H (CGC>CAC)	rpsL	ribosomal protein S12 (BS12)	BAMF_0110	1	unfixed	0	0	0.447504	0	0
R2	FN597644	551180	G	C	SNP	intergenic	intergenic (-109/+7)	yvdT/yveA	putative transcriptional regulator (TetR/AcrR family)/L-aspartate/L-glutamate permease	BAMF_0521/BAMF_0522	1	unfixed	0	0	0.113467	0	0
R2	FN597644	555622	T	C	SNP	intergenic	intergenic (+50/-380)	yhfP/iolT	conserved hypothetical protein YhfP/Sugar/inositol transporter	BAMF_0525/BAMF_0526	2	late Fixed	0	0	0	1	1
R2	FN597644	646020	G	C	SNP	nonsynonymous	G24A (GGA>GCA)	moxR	conserved hypothetical protein	BAMF_0625	1	unfixed	0	0	1	0	0
R2	FN597644	661209	C	---	DEL	---	intergenic (+37/-42)	purB/purC	adenylosuccinate lyase/phosphoribosylaminoimidazole succinocarboxamide synthetase	BAMF_0638/BAMF_0639	4	early Fixed	0	1	1	1	1
R2	FN597644	1133658	G	A	SNP	nonsynonymous	G475D (GGC>GAC)	yhgE	putative methyl-accepting protein	BAMF_1109	1	unfixed	0	0	0.609681	0	0
R2	FN597644	1271200	A	C	SNP	intergenic	intergenic (-69/+80)	cotZ/cotY	spore coat protein (insoluble fraction)/outer spore coat protein (insoluble fraction)	BAMF_1248/BAMF_1249	1	unfixed	0	0	0	0.141574	0
R2	FN597644	1627177	C	T	SNP	synonymous	R1024R (CGC>CGT)	pyrAB	pyrimidine-specific carbamoyl-phosphate synthetase (large subunit)	BAMF_1623	2	late Fixed	0	0	0	1	1
R2	FN597644	2044239	T	---	DEL	---	intergenic (+86/+47)	iseA/BAMF__t62	IseA/tRNA-Arg	BAMF_1943/BAMF__t62	4	unfixed	0	0.0973315	0.121009	0.0791278	0.0702977
R2	FN597644	2044244	T	C	SNP	intergenic	intergenic (+91/+42)	iseA/BAMF__t62	IseA/tRNA-Arg	BAMF_1943/BAMF__t62	4	unfixed	0	0.893443	0.896464	0.899446	0.929875
R2	FN597644	2044245	C	T	SNP	intergenic	intergenic (+92/+41)	iseA/BAMF__t62	IseA/tRNA-Arg	BAMF_1943/BAMF__t62	4	early Fixed	0	1	1	1	1
R2	FN597644	2177454	C	A	SNP	nonsynonymous	V198L (GTG>TTG)	ypgQ	putative metal-dependent phosphohydrolase	BAMF_2089	1	unfixed	0	1	0	0	0
R2	FN597644	2298582	C	T	SNP	nonsynonymous	G129E (GGA>GAA)	ribH	6,7-dimethyl-8-ribityllumazine synthase, beta subunit	BAMF_2224	2	late Fixed	0	0	0	1	1
R2	FN597644	2455033	C	T	SNP	nonsynonymous	V211I (GTC>ATC)	yqfU	putative integral inner membrane protein	BAMF_2409	1	unfixed	0	0	0.375384	0	0
R2	FN597644	2997605	A	T	SNP	nonsynonymous	L95H (CTC>CAC)	pgi	glucose-6-phosphate isomerase	BAMF_2935	1	unfixed	0	0	0	0.116025	0
R2	FN597644	3066372	C	T	SNP	nonsynonymous	G3E (GGA>GAA)	besA	trilactone hydrolase	BAMF_2997	1	unfixed	0	0	0.106917	0	0
R2	FN597644	3137291	G	A	SNP	nonsynonymous	T348I (ACC>ATC)	phi105_20	phage related protein phi105_20	BAMF_3075	1	unfixed	0	0	0.841964	0	0
R2	FN597644	3151818	C	T	SNP	intergenic	intergenic (+7/+875)	BAMF_3091/phi105_47	hypothetical protein predicted by Glimmer/Critica/hypothetical protein phi105_47 [Bacillus phage phi105]	BAMF_3091/BAMF_3092	2	late Fixed	0	0	0	1	1
R2	FN597644	3495579	C	T	SNP	nonsynonymous	R83Q (CGG>CAG)	capB	poly-gamma-glutamate synthetase	BAMF_3430	2	late Fixed	0	0	0	1	1
R2	FN597644	3808772	A	---	DEL	---	coding (2430/2676 nt)	BAMF_3753	endonuclease	BAMF_3753	1	late Fixed	0	0	0	0	1
R3	FN597644	646020	G	C	SNP	nonsynonymous	G24A (GGA>GCA)	moxR	conserved hypothetical protein	BAMF_0625	3	early Fixed	0	0	1	1	1
R3	FN597644	661209	C	---	DEL	---	intergenic (+37/-42)	purB/purC	adenylosuccinate lyase/phosphoribosylaminoimidazole succinocarboxamide synthetase	BAMF_0638/BAMF_0639	4	early Fixed	0	1	1	1	1
R3	FN597644	713879	T	A	SNP	intergenic	intergenic (+32/-282)	STAS/yezD	Sulphate transporter/antisigma-factor/conserved hypothetical protein	BAMF_0688/BAMF_0689	1	unfixed	0	0	0	0.112731	0
R3	FN597644	1383322	C	T	SNP	synonymous	H221H (CAC>CAT)	dppB	dipeptide ABC transporter (permease)	BAMF_1381	2	late Fixed	0	0	0	1	1
R3	FN597644	1616532	T	C	SNP	intergenic	intergenic (+32/-120)	ileS/ylyA	isoleucyl-tRNA synthetase/conserved hypothetical protein	BAMF_1614/BAMF_1615	1	unfixed	0	0	0	0	0.179218
R3	FN597644	2044244	T	C	SNP	intergenic	intergenic (+91/+42)	iseA/BAMF__t62	IseA/tRNA-Arg	BAMF_1943/BAMF__t62	3	unfixed	0	0.91958	0	0.905385	0.932573
R3	FN597644	2044245	C	T	SNP	intergenic	intergenic (+92/+41)	iseA/BAMF__t62	IseA/tRNA-Arg	BAMF_1943/BAMF__t62	3	late Fixed	0	1	0	1	1
R3	FN597644	2177454	C	A	SNP	nonsynonymous	V198L (GTG>TTG)	ypgQ	putative metal-dependent phosphohydrolase	BAMF_2089	1	unfixed	0	1	0	0	0
R3	FN597644	2702300	G	A	SNP	intergenic	intergenic (-27/+187)	abf2/etfA	alpha-N-arabinofuranosidase II/electron transfer flavoprotein (alpha subunit)	BAMF_2656/BAMF_2657	2	late Fixed	0	0	0	1	1
R3	FN597644	3607641	G	A	SNP	synonymous	F103F (TTC>TTT)	fadF	putative iron-sulphur-binding reductase	BAMF_3554	2	late Fixed	0	0	0	1	1
R4	FN597644	646020	G	C	SNP	nonsynonymous	G24A (GGA>GCA)	moxR	conserved hypothetical protein	BAMF_0625	3	early Fixed	0	0	1	1	1
R4	FN597644	661209	C	---	DEL	---	intergenic (+37/-42)	purB/purC	adenylosuccinate lyase/phosphoribosylaminoimidazole succinocarboxamide synthetase	BAMF_0638/BAMF_0639	4	early Fixed	0	1	1	1	1
R4	FN597644	1383322	C	T	SNP	synonymous	H221H (CAC>CAT)	dppB	dipeptide ABC transporter (permease)	BAMF_1381	2	late Fixed	0	0	0	1	1
R4	FN597644	1699146	C	T	SNP	nonsynonymous	A35V (GCT>GTT)	ylxF	putative kinesin-like protein	BAMF_1697	1	unfixed	0	0	0.157224	0	0
R4	FN597644	1895501	G	T	SNP	intergenic	intergenic (+154/-196)	xynA/pps	XynA/Pps	BAMF_1830/BAMF_1831	1	unfixed	0	0	0	0.117549	0
R4	FN597644	2044239	T	---	DEL	---	intergenic (+86/+47)	iseA/BAMF__t62	IseA/tRNA-Arg	BAMF_1943/BAMF__t62	4	unfixed	0	0.104467	0.0629811	0.0567293	0.0559921
R4	FN597644	2044244	T	C	SNP	intergenic	intergenic (+91/+42)	iseA/BAMF__t62	IseA/tRNA-Arg	BAMF_1943/BAMF__t62	4	unfixed	0	0.903439	0.922188	0.945918	0.931941
R4	FN597644	2044245	C	T	SNP	intergenic	intergenic (+92/+41)	iseA/BAMF__t62	IseA/tRNA-Arg	BAMF_1943/BAMF__t62	4	early Fixed	0	1	1	1	1
R4	FN597644	2340292	G	A	SNP	nonsynonymous	P122S (CCT>TCT)	yqjP	putative metal-dependent hydrolase	BAMF_2276	1	unfixed	0	0	0.236598	0	0
R4	FN597644	2611802	C	T	SNP	nonsynonymous	G329R (GGG>AGG)	hisS	histidyl-tRNA synthetase	BAMF_2566	1	unfixed	0	0	0.117388	0	0
R4	FN597644	2702300	G	A	SNP	intergenic	intergenic (-27/+187)	abf2/etfA	alpha-N-arabinofuranosidase II/electron transfer flavoprotein (alpha subunit)	BAMF_2656/BAMF_2657	2	late Fixed	0	0	0	1	1
R4	FN597644	2751645	G	A	SNP	nonsynonymous	A154V (GCA>GTA)	dnaB	helicase loading protein; replication initiation membrane attachment protein	BAMF_2702	1	unfixed	0	0	0.155307	0	0
R4	FN597644	2997605	A	T	SNP	nonsynonymous	L95H (CTC>CAC)	pgi	glucose-6-phosphate isomerase	BAMF_2935	2	unfixed	0	0	0	0.091053	0.11796
R4	FN597644	3506467	T	G	SNP	synonymous	V139V (GTT>GTG)	ywsB	Uncharacterized protein YwsB	BAMF_3442	1	unfixed	0	0	0	0	0.102917
R4	FN597644	3607641	G	A	SNP	synonymous	F103F (TTC>TTT)	fadF	putative iron-sulphur-binding reductase	BAMF_3554	2	late Fixed	0	0	0	1	1
R5	FN597644	394133	G	A	SNP	synonymous	T137T (ACG>ACA)	yclQ	putative iron-siderophore ABC transporter (binding lipoprotein)	BAMF_0351	2	late Fixed	0	0	0	1	1
R5	FN597644	455767	C	T	SNP	nonsynonymous	S14N (AGC>AAC)	yvaE	putative metabolite-efflux transporter	BAMF_0414	1	unfixed	0	0	1	0	0
R5	FN597644	646020	G	C	SNP	nonsynonymous	G24A (GGA>GCA)	moxR	conserved hypothetical protein	BAMF_0625	2	late Fixed	0	0	0	1	1
R5	FN597644	661209	C	---	DEL	---	intergenic (+37/-42)	purB/purC	adenylosuccinate lyase/phosphoribosylaminoimidazole succinocarboxamide synthetase	BAMF_0638/BAMF_0639	4	early Fixed	0	1	1	1	1
R5	FN597644	761719	C	T	SNP	synonymous	L199L (CTC>CTT)	BAMF_0723	putative response regulator in two-component regulatory system	BAMF_0723	1	unfixed	0	0	1	0	0
R5	FN597644	1133658	G	A	SNP	nonsynonymous	G475D (GGC>GAC)	yhgE	putative methyl-accepting protein	BAMF_1109	2	late Fixed	0	0	0	1	1
R5	FN597644	1271203	T	C	SNP	intergenic	intergenic (-72/+77)	cotZ/cotY	spore coat protein (insoluble fraction)/outer spore coat protein (insoluble fraction)	BAMF_1248/BAMF_1249	1	unfixed	0	0	0	0	0.310015
R5	FN597644	2044244	T	C	SNP	intergenic	intergenic (+91/+42)	iseA/BAMF__t62	IseA/tRNA-Arg	BAMF_1943/BAMF__t62	3	unfixed	0	0.910542	0.922366	0.947165	0
R5	FN597644	2044245	C	T	SNP	intergenic	intergenic (+92/+41)	iseA/BAMF__t62	IseA/tRNA-Arg	BAMF_1943/BAMF__t62	3	unfixed	0	1	1	1	0
R5	FN597644	2177454	C	A	SNP	nonsynonymous	V198L (GTG>TTG)	ypgQ	putative metal-dependent phosphohydrolase	BAMF_2089	1	unfixed	0	1	0	0	0
R5	FN597644	2997605	A	T	SNP	nonsynonymous	L95H (CTC>CAC)	pgi	glucose-6-phosphate isomerase	BAMF_2935	2	unfixed	0	0	0.100933	0.128935	0
R5	FN597644	3137291	G	A	SNP	nonsynonymous	T348I (ACC>ATC)	phi105_20	phage related protein phi105_20	BAMF_3075	2	late Fixed	0	0	0	1	1
R5	FN597644	3321696	G	A	SNP	intergenic	intergenic (+67/-116)	RBAM_031420/gntK	Uncharacterized HTH-type transcriptional regulator RBAM_031420/gluconate kinase	BAMF_3264/BAMF_3265	2	late Fixed	0	0	0	1	1
R5	FN597644	3968295	A	G	SNP	nonsynonymous	F292L (TTT>CTT)	yyaD	putative integral membrane protein; putative transporter	BAMF_3910	2	late Fixed	0	0	0	1	1
